## Atrial Fibrillation is related with higher in-hospital mortality in acute myocardial infarction (AMI) patients from K-ACTIVE registry

H. Mori<sup>1</sup>, A. Maeda<sup>1</sup>, Y. Akashi<sup>2</sup>, J. Ako<sup>3</sup>, Y. Ikari<sup>4</sup>, T. Ebina<sup>5</sup>, N. Sato<sup>6</sup>, K. Tamura<sup>7</sup>, A. Namiki<sup>8</sup>, K. Fukui<sup>9</sup>, I. Michishita<sup>10</sup>, K. Kimura<sup>5</sup>, H. Suzuki<sup>1</sup>

<sup>1</sup>Fujigaoka Hospital, Yokohama, Japan; <sup>2</sup>St. Marianna University School of Medicine, Kawasaki, Japan; <sup>3</sup>Kitasato University Hospital, Sagami, Japan; <sup>4</sup>Tokai University Hospital, Isehara, Japan; <sup>5</sup>Yokohama City University Medical Center, Yokohama, Japan; <sup>6</sup>Nippon Medical School Musashi-Kosugi Hospital, Kawasaki, Japan; <sup>7</sup>Yokohama City University Hospital, Yokohama, Japan; <sup>8</sup>Kanto Rosai Hospital, Kawasaki, Japan; <sup>9</sup>Kanagawa Cardiovascular and Respiratory Center, Yokohama, Japan; <sup>10</sup>Yokohama Sakae Kyosai Hospital, Yokohama, Japan

On behalf of K-ACTIVE Registry

**Funding Acknowledgement:** Type of funding source: Public grant(s) – National budget only. Main funding source(s): This work was supported by JSPS KAKENHI Grant Number JP15K09101.

**Background:** The prognostic significance of atrial fibrillation (AF) on in-hospital mortality in acute myocardial infarction (AMI) patients is not fully understood in Japanese patients.

**Methods:** To elucidate the clinical significance of AF on in-hospital mortality in AMI patients, we analyzed the Japanese observational prospective multicenter registry of acute myocardial infarction (K-ACTIVE: Kanagawa ACuTe cardio Vascular rEgistry), which spans October 2016 to December 2019.

**Results:** A total of 3482 patients included 336 patients with AF and 3146 patients with sinus rhythm. Table 1 shows patient baseline characteristics. Patients with AF were significantly older than those with sinus rhythm (75 vs 67,  $P < 0.0001$ ). Prevalence of hypertension and hemodialysis were significantly greater in patients with AF than patients with sinus rhythm while

prevalence of dyslipidemia and smoking were significantly less in patients with AF than patients with sinus rhythm. Table 2 shows characteristics of AMI. There were no significant difference in prevalence of STEMI, area of MI, Peak CK/CK-MB and prevalence of multivessel disease. However, patients with AF showed lower systolic blood pressure, faster heart rate, worse Killip category, greater prevalence of OHCA. Need of mechanical support including IABP/ECMO were greater in patients with AF than patients with sinus rhythm. In-hospital mortality was significantly higher in patients with AF than in patients with sinus rhythm (Figure, 10.4% versus 5.2%,  $P = 0.0005$ ). This trend didn't change even after adjustment with age and sex (Odds ratio 1.6 95% confidence interval 1.1–2.4,  $P = 0.02$ ).

**Conclusion:** AF was associated with higher in-hospital mortality in Japanese AMI patients.

Table 1

|                  | AF         | SR         | P-value |
|------------------|------------|------------|---------|
| Number           | 336        | 3146       |         |
| Male             | 77%        | 78%        | 0.78    |
| Age              | 75 ± 11    | 67 ± 13    | <0.0001 |
| Hypertension     | 73%        | 65%        | 0.002   |
| Diabetes         | 38%        | 33%        | 0.08    |
| Dyslipidemia     | 49%        | 59%        | 0.001   |
| Hemodialysis     | 5%         | 2%         | 0.002   |
| Smoking (active) | 21%        | 37%        | <0.0001 |
| LDL, mg/dl       | 107 ± 40   | 126 ± 41   | <0.0001 |
| HDL, mg/dl       | 50 ± 14    | 50 ± 16    | 0.69    |
| HbA1c, %         | 6.3 ± 1.2% | 6.3 ± 1.3% | 0.91    |
| Cre, mg/dl       | 1.4 ± 1.7  | 1.1 ± 1.2  | <0.0001 |

AF, atrial fibrillation; SR sinus rhythm; LDL, Low density lipoprotein; HDL, High density lipoprotein; HbA1c, hemoglobin a1c; Cre, Creatine

Figure

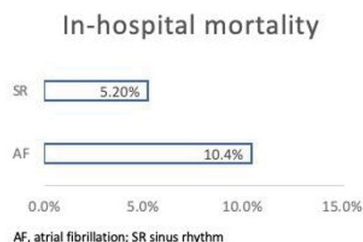

Table 2

|                  | AF          | SR          | P-value |
|------------------|-------------|-------------|---------|
| Type of AMI      |             |             | 0.50    |
| STEMI            | 81%         | 82%         |         |
| NSTEMI           | 19%         | 18%         |         |
| Area of AMI      |             |             | 0.52    |
| anterior         | 51%         | 54%         |         |
| inferior         | 35%         | 35%         |         |
| posterolateral   | 14%         | 11%         |         |
| Peak CK, IU/l    | 2727 ± 3485 | 2497 ± 2830 | 0.17    |
| Peak CK-MB, IU/l | 225 ± 261   | 211 ± 232   | 0.36    |
| Multivessel      | 49%         | 48%         | 0.61    |
| SBP, mmHg        | 130 ± 33    | 141 ± 32    | <0.0001 |
| HR               | 83 ± 29     | 79 ± 21     | 0.002   |
| Killip           |             |             | <0.0001 |
| 1                | 60%         | 80%         |         |
| 2                | 12%         | 6%          |         |
| 3                | 10%         | 6%          |         |
| 4                | 18%         | 8%          |         |
| OHCA             | 8%          | 4%          | 0.003   |
| IABP             | 24%         | 13%         | <0.0001 |
| ECMO             | 5%          | 3%          | 0.06    |
| CABG             | 1%          | 1%          | 0.59    |

AF, atrial fibrillation; SR sinus rhythm; AMI, acute myocardial infarction; STEMI, ST-elevation myocardial infarction; NSTEMI, Non-ST-elevation myocardial infarction; CK, Creatine kinase; SBP, Systolic blood pressure; HR, heart rate; OHCA, out of hospital cardiac arrest; IABP, intra-aortic balloon pumping; ECMO, extra-corporeal membrane oxygenation; CABG, coronary artery bypass graft
